# Supplementary material for: Utility of established prognostic scores in COVID-19 hospital admissions: multicentre prospective evaluation of CURB-65, NEWS2 and qSOFA
Source: BMJ Open Respir Res. 2020 Dec 7;7(1):e000729. doi: 10.1136/bmjresp-2020-000729 (PMC7722817; doi:10.1136/bmjresp-2020-000729)
Supplement: Supplementary data [file bmjresp-2020-000729supp001.pdf]

## Supplementary data and figures:

### List of participating organisations:

Blackpool Teaching Hospitals NHS Foundation Trust, Blackpool, UK

Countess of Chester Hospital NHS Foundation Trust, Chester, UK

Liverpool University Hospitals NHS Foundation Trust, Liverpool, UK

Manchester University NHS Foundation Trust, Manchester, UK

Mid Cheshire Hospitals NHS Foundation Trust, Leighton, UK

Lancashire Teaching Hospitals NHS Foundation Trust, Preston, UK

Southport and Ormskirk Hospital NHS Trust, Southport, UK

Liverpool Heart & Chest Hospital NHS Foundation Trust, Liverpool, UK\*

\*=No acute admissions, outcomes recorded from critical care transfers only.

**Table S1:** Demographics and clinical characteristics at presentation with comparison by 72-hour outcome

|                                       | Missing   | Death within 72 hours |                   | p      |
|---------------------------------------|-----------|-----------------------|-------------------|--------|
|                                       |           | Alive                 | Dead              |        |
| n                                     |           | 767                   | 63                |        |
| <b>Age (Years)</b>                    | 1 (0.1%)  | 69 (58,79)            | 80 (75,87)        | <0.001 |
| <b>Sex (Male)</b>                     | 0 (0.0%)  | 474 (61.8%)           | 35 (55.6%)        | 0.348  |
| <b>Clinical Frailty Score</b>         | 81 (9.8%) | 3 (2,6)               | 6 (4,7)           | <0.001 |
| <b>Temp (°C)</b>                      | 3 (0.4%)  | 37.5 (36.8,38.2)      | 37.5 (37.0,38.4)  | 0.356  |
| <b>Respiratory rate(/min)</b>         | 2 (0.2%)  | 23 (20,28)            | 26 (22,34)        | <0.001 |
| <b>Heart rate (bpm)</b>               | 1 (0.1%)  | 94 (81,108)           | 96 (82,119)       | 0.155  |
| <b>Systolic BP (mmHg)</b>             | 2 (0.2%)  | 130 (115,145)         | 130 (109,151)     | 0.721  |
| <b>Diastolic BP (mmHg)</b>            | 2 (0.2%)  | 75 (66,84)            | 70 (62,85)        | 0.162  |
| <b>SpO2</b>                           | 1 (0.1%)  | 94 (90,96)            | 92 (86,94.5)      | 0.002  |
| <b>Supplemental oxygen</b>            | 2 (0.2%)  | 297 (38.7%)           | 43 (68.3%)        | <0.001 |
| <b>SpO2/FiO2 ratio</b>                | 2(0.2%)   | 419 (313, 448)        | 209 (116, 410)    | <0.001 |
| <b>Confusion</b>                      | 0 (0.0%)  | 159 (20.7%)           | 24 (38.1%)        | 0.002  |
| <b>Urea (mmol/L)</b>                  | 8 (1.0%)  | 7.0(4.9,10.8)         | 12.3(8.9,19.9)    | <0.001 |
| <b>Consolidation</b>                  | 4 (0.5%)  | 624 (81.7%)           | 60 (96.8%)        | 0.001  |
| <b>CRP (mg/L)</b>                     | 10 (1.2%) | 100.0(46.0,165.2)     | 169.0(92.0,244.0) | <0.001 |
| <b>WCC 10<sup>9</sup>/L</b>           | 4 (0.5%)  | 7.3(5.5,10.0)         | 8.2(6.6,11.6)     | 0.014  |
| <b>Neutrophils (10<sup>9</sup>/L)</b> | 7 (0.8%)  | 5.7(3.8,8.3)          | 7.2(4.6,9.9)      | 0.014  |
| <b>Lymphocytes (10<sup>9</sup>/L)</b> | 9 (1.1%)  | 0.8(0.6,1.1)          | 0.7(0.4,1.0)      | 0.01   |
| <b>NLR</b>                            | 9 (1.1%)  | 159.5(96.0,202.0)     | 120.0(39.0,179.5) | 0.003  |

**Abbreviations:** CFS=Clinical frailty scale; BP=blood pressure; SpO2=oxygen saturation by pulse oximetry; FiO2=fraction of inspired oxygen; CRP=C-reactive protein; WCC=White cell count; NLR=Neutrophil/Lymphocyte ratio

**Table S2: Restricted analysis of CURB65 0-1.**

Baseline demographics and clinical characteristics with comparison by outcome at 30 days. Data are presented as n(%) or median (IQR). P-values are calculated using Fisher's exact test for categorical variables, Mann-Whitney (M) test for continuous variables since none of the continuous variables follow the assumption of normality (Shapiro normality test p-value=<0.001 for all of them).

|                                        | Missing  | All               | Death by 30 days  |                   |        |
|----------------------------------------|----------|-------------------|-------------------|-------------------|--------|
|                                        |          |                   | Alive             | Dead              | p      |
| <b>n</b>                               |          | 317               | 261               | 56                |        |
| <b>Characteristics at presentation</b> |          |                   |                   |                   |        |
| Age (Years)                            | 0 (0.0%) | 58.0 (50.0,64.0)  | 57.0 (49.0,63.0)  | 61.0 (57.8,66.3)  | <0.001 |
| Sex (Male)                             | 0 (0.0%) | 199 (62.8%)       | 164 (62.8%)       | 35 (62.5%)        | 1.000  |
| CFS                                    | 38 (12%) | 2 (1,3)           | 2 (1,3)           | 3 (1,5)           | 0.014  |
| Temp (°C)                              | 2 (0.6%) | 37.6 (37.0,38.2)  | 37.6 (37.0,38.2)  | 37.7 (37.1,38.2)  | 0.638  |
| Respiratory rate (/min)                | 1 (0.3%) | 22.0 (20.0,26.0)  | 22.0 (20.0,26.0)  | 24.0 (20.0,27.3)  | 0.336  |
| Heart rate (bpm)                       | 0 (0.0%) | 96 (84,109)       | 97 (84,109)       | 95 (82,113)       | 0.744  |
| Systolic BP (mmHg)                     | 0 (0.0%) | 132 (119,147)     | 133 (120,148)     | 132 (118,144)     | 0.486  |
| Diastolic BP (mmHg)                    | 0 (0.0%) | 78.0 (70.0,86.0)  | 79.0 (72.0,87.0)  | 72.5 (66.0,84.0)  | 0.005  |
| SpO2                                   | 0 (0.0%) | 94.0 (91.0,96.0)  | 94.0 (91.0,96.0)  | 93.5 (90.0,96.0)  | 0.649  |
| Supplemental oxygen                    | 1 (0.3%) | 113 (18.7%)       | 86 (33.0%)        | 27 (48.2%)        | 0.044  |
| SpO2/FiO2 ratio                        | 1(0.3%)  | 427 (320, 448)    | 433 (343,448)     | 358 (158,443)     | 0.005  |
| Confusion                              | 0 (0.0%) | 8 (2.5%)          | 7 (2.7%)          | 1 (1.8%)          | 1.000  |
| <b>Investigations</b>                  |          |                   |                   |                   |        |
| Urea (mmol/L)                          | 4 (1.3%) | 5.0(4.0,6.5)      | 4.9(3.9,6.3)      | 6.1(4.3,7.8)      | 0.005  |
| CRP (mg/L)                             | 3 (0.9%) | 109.0(51.0,168.8) | 102.0(48.5,161.5) | 136.0(87.5,180.0) | 0.027  |
| WCC (10 <sup>9</sup> /L)               | 2 (0.6%) | 7.2(5.4,9.2)      | 7.1(5.4,9.0)      | 7.6(5.5,11.3)     | 0.328  |
| Neutrophils (10 <sup>9</sup> /L)       | 4 (1.3%) | 5.4(3.7,7.7)      | 5.4(3.7,7.5)      | 5.8(4.2,8.9)      | 0.261  |
| Lymphocytes (10 <sup>9</sup> /L)       | 4 (1.3%) | 0.9(0.6,1.2)      | 0.9(0.7,1.2)      | 0.7(0.5,1.1)      | 0.008  |
| NLR                                    | 4 (1.3%) | 169.0(98.0,201.0) | 169.0(99.5,201.5) | 151.5(78.0,199.2) | 0.595  |

**Abbreviations:** CFS=Clinical frailty scale; BP=blood pressure; SpO2=oxygen saturation by pulse oximetry; FiO2=fraction of inspired oxygen; CRP=C-reactive protein; WCC=White cell count; NLR=Neutrophil/Lymphocyte ratio

**Table S3:** Score performance for ICU admission as outcome (sensitivity, specificity, PPV, NPV)

| Tool                        | Score(n) | Number of ICU admission (%) | ICU admission |             |      |      |
|-----------------------------|----------|-----------------------------|---------------|-------------|------|------|
|                             |          |                             | Sensitivity   | Specificity | PPV  | NPV  |
| CURB65 (n=605) <sup>+</sup> | <2 (273) | 68 (24.9%)                  | 0.38          | 0.41        | 0.13 | 0.75 |
|                             | ≥2 (332) | 42 (12.7%)                  |               |             |      |      |
|                             | <3 (434) | 94 (21.7%)                  | 0.15          | 0.69        | 0.09 | 0.78 |
|                             | ≥3 (171) | 16 (9.4%)                   |               |             |      |      |
| NEWS2 (n=730)               | <5 (215) | 21 (9.8%)                   | 0.82          | 0.32        | 0.18 | 0.90 |
|                             | ≥5 (515) | 95 (18.4%)                  |               |             |      |      |
| qSOFA (n=730)               | <2 (596) | 103 (17.3%)                 | 0.11          | 0.80        | 0.10 | 0.83 |
|                             | ≥2 (134) | 13 (9.7%)                   |               |             |      |      |

Abbreviations: PPV = Positive predictive value; NPV = Negative predictive value

<sup>+</sup>=Analysis restricted to those with consolidation on chest radiograph.

**Table S4:** Logistic regression models for 30-day mortality fitted using the individual constituents of each score.

| Model                                  | Variables                   | OR (95%CI)         | p-value |
|----------------------------------------|-----------------------------|--------------------|---------|
| <b>CURB-65</b><br>(n=605) <sup>+</sup> | Confusion (Yes)             | 1.29 (0.83 - 1.99) | 0.258   |
|                                        | Urea (>7mmol/L)             | 2.94 (1.97 - 4.38) | <0.001* |
|                                        | Respiratory Rate (≥30)      | 2.37 (1.52 - 3.69) | <0.001* |
|                                        | BP (SBP<90 or DBP≤60)       | 1.42 (0.88 - 2.31) | 0.155   |
|                                        | Age (≥ 65)                  | 3.25 (2.13 - 4.95) | <0.001* |
| <b>NEWS2</b><br>(n=730)                | Respiratory Rate            |                    |         |
|                                        | 2 points                    | 1.29 (0.84 – 1.97) | 0.245   |
|                                        | 3 points                    | 1.90 (1.25 – 2.90) | 0.003*  |
|                                        | SpO2                        |                    |         |
|                                        | 1 point                     | 0.81 (0.50 – 1.30) | 0.379   |
|                                        | 2 points                    | 1.59 (0.97 – 2.60) | 0.064   |
|                                        | 3 points                    | 1.47 (0.99 – 2.20) | 0.058   |
|                                        | FiO2                        |                    |         |
|                                        | 2 point                     | 2.00 (1.43 – 2.80) | <0.001* |
|                                        | Temperature                 |                    |         |
|                                        | 1 point                     | 1.43 (0.99 – 2.06) | 0.059   |
|                                        | 2 points                    | 1.68 (0.90 – 3.14) | 0.102   |
|                                        | 3 points                    | 1.33 (0.32 – 5.42) | 0.694   |
|                                        | Systolic BP                 |                    |         |
|                                        | 1 point                     | 1.19 (0.68 – 2.06) | 0.541   |
|                                        | 2 points                    | 2.06 (1.04 – 4.06) | 0.038*  |
|                                        | 3 points                    | 1.23 (0.56 – 2.70) | 0.606   |
|                                        | Heart rate                  |                    |         |
|                                        | 1 point                     | 0.65 (0.45 – 0.95) | 0.026*  |
|                                        | 2 points                    | 0.78 (0.49 – 1.25) | 0.303   |
|                                        | 3 points                    | 0.84 (0.39 – 1.79) | 0.651   |
|                                        | Confusion (Yes)             | 2.35 (1.63 – 3.40) | <0.001* |
| <b>qSOFA</b><br>(n=730)                | Respiratory Rate (≥ 22)     | 1.85 (1.33 - 2.58) | <0.001* |
|                                        | Systolic BP (≤100)          | 1.74 (1.04 - 2.91) | 0.035*  |
|                                        | Altered mental status (Yes) | 2.37 (1.66 - 3.38) | <0.001* |

\*Analysis restricted to those with consolidation on chest radiograph.
